# Supplementary material for: Combined Transcriptome and Proteome Analysis of RpoS Regulon Reveals Its Role in Spoilage Potential of Pseudomonas fluorescens
Source: Front Microbiol. 2019 Feb 6;10:94. doi: 10.3389/fmicb.2019.00094 (PMC6372562; doi:10.3389/fmicb.2019.00094)
Supplement: Supplementary file 7 [file Table_7.XLSX]

## Sheet: rpoSvsUK4
Supplementary Table S7 Detailed data related to the 212 DEPs between the rpoS mutant and the wild-type strain.
Protein accession	Protein description	rpoS/UK4 Ratio	Regulated Type	rpoS/UK4 P value	MW [kDa]	Score	Coverage [%]	#Peptides	#PSMs	#Unique peptides
WP_003173733.1	MULTISPECIES: transporter [Pseudomonas]	1.965	Up	0.00132	7.6729	9.58	14.1	1	1	1
WP_003188807.1	MULTISPECIES: hypothetical protein [Pseudomonas]	0.587	Down	0.0248	9.696	39.691	48.8	3	5	3
WP_003189131.1	MULTISPECIES: cold-shock protein [Pseudomonas]	1.263	Up	0.00945	7.7155	69.7	66.7	5	15	4
WP_003465068.1	MULTISPECIES: transposase [Proteobacteria]	0.527	Down	4.01e-05	62.397	45.213	9.1	6	6	6
WP_008603564.1	fapF [Pseudomonas fluorescens]	0.468	Down	0.000266	46.466	27.132	10.9	4	5	4
WP_017739508.1	MULTISPECIES: PrkA family serine protein kinase [Pseudomonas]	0.097	Down	0.000278	73.796	323.31	45.2	27	56	27
WP_019334920.1	MULTISPECIES: hypothetical protein [Pseudomonas]	0.807	Down	0.0137	45.669	148.35	31.2	11	19	11
WP_019334922.1	MULTISPECIES: hypothetical protein [Pseudomonas]	0.833	Down	0.023	18.052	27.001	25	4	4	4
WP_024015038.1	MULTISPECIES: ATPase AAA [Pseudomonas]	0.201	Down	0.000309	36.234	19.009	7.7	2	2	2
WP_029290059.1	MULTISPECIES: cell wall assembly protein [Pseudomonas fluorescens group]	0.560	Down	0.00435	15.564	7.5606	6.7	1	1	1
WP_029297013.1	lipoprotein [Pseudomonas fluorescens]	0.792	Down	0.0108	22.386	250.86	71.8	14	22	14
WP_029299807.1	peptidoglycan-binding protein LysM [Pseudomonas fluorescens]	0.471	Down	0.00061	15.475	172.21	61	8	17	8
WP_032857113.1	MULTISPECIES: dodecin flavoprotein [Pseudomonas fluorescens group]	0.155	Down	0.000378	7.8778	11.423	15.5	1	4	1
WP_032862631.1	MULTISPECIES: hypothetical protein [Pseudomonas fluorescens group]	0.414	Down	0.000113	23.778	6.3233	4.2	1	1	1
WP_038440361.1	tyrosine--tRNA ligase [Pseudomonas fluorescens]	0.782	Down	0.0161	19.307	37.371	24.2	5	8	5
WP_038440370.1	glycosyl transferase family 1 [Pseudomonas fluorescens]	0.619	Down	0.0195	40.704	15.735	6	2	3	2
WP_038440372.1	beta-xylosidase [Pseudomonas fluorescens]	0.577	Down	0.0143	50.666	24.845	7	4	4	4
WP_038440373.1	glycosyl transferase family 1 [Pseudomonas fluorescens]	0.684	Down	0.0125	43.261	43.405	16.3	7	7	7
WP_038440374.1	LPS biosynthesis protein [Pseudomonas fluorescens]	0.590	Down	0.00452	73.616	219.79	38.2	25	35	25
WP_038440377.1	glycosyl transferase [Pseudomonas fluorescens]	0.526	Down	0.0012	33.898	31.034	13.9	5	7	5
WP_038440378.1	mannose-1-phosphate guanylyltransferase/mannose-6-phosphate isomerase [Pseudomonas fluorescens]	0.593	Down	0.0205	53.475	47.751	13.1	6	8	6
WP_038440528.1	hydroxyacid dehydrogenase [Pseudomonas fluorescens]	0.255	Down	0.00673	38.538	35.648	12.4	5	6	5
WP_038440570.1	hypothetical protein [Pseudomonas fluorescens]	1.214	Up	0.00925	20.548	64.111	46.4	7	13	7
WP_038440589.1	type I secretion target [Pseudomonas fluorescens]	1.713	Up	0.000809	65.044	15.392	3.7	2	2	2
WP_038440591.1	DNA-binding response regulator [Pseudomonas fluorescens]	1.217	Up	0.0284	21.859	32.572	25	4	6	4
WP_038440618.1	alpha/beta hydrolase [Pseudomonas fluorescens]	0.460	Down	0.00072	35.96	49.472	11.4	3	6	3
WP_038440624.1	protein activator of alkane oxidation PraB [Pseudomonas fluorescens]	0.508	Down	0.00224	17.018	32.722	10.1	1	3	1
WP_038440688.1	3-methyladenine DNA glycosylase [Pseudomonas fluorescens]	1.213	Up	0.0452	24.045	18.795	12	3	4	3
WP_038440742.1	gamma-glutamyltranspeptidase [Pseudomonas fluorescens]	0.671	Down	0.00141	60.961	110.18	20.7	13	15	13
WP_038440923.1	alpha-ketoglutarate dehydrogenase [Pseudomonas fluorescens]	1.204	Up	0.03	98.106	109.82	16.6	15	18	15
WP_038440941.1	protease [Pseudomonas fluorescens]	1.357	Up	0.00711	36.369	36.303	12.7	4	6	4
WP_038440952.1	thioesterase [Pseudomonas fluorescens]	1.391	Up	0.0469	17.947	30.662	16.5	3	4	3
WP_038440989.1	hypothetical protein [Pseudomonas fluorescens]	0.690	Down	0.0166	24.516	28.131	12	4	5	4
WP_038441046.1	peroxiredoxin [Pseudomonas fluorescens]	0.809	Down	0.0296	20.435	139.23	55.6	9	36	9
WP_038441099.1	lipoprotein [Pseudomonas fluorescens]	0.438	Down	0.00699	24.132	82.737	42.2	7	10	7
WP_038441102.1	arylsulfatase [Pseudomonas fluorescens]	0.155	Down	0.000406	58.258	137.67	28.5	14	19	14
WP_038441119.1	cell envelope protein [Pseudomonas fluorescens]	0.447	Down	7.67e-05	51.808	27.549	8.2	4	6	4
WP_038441121.1	hypothetical protein [Pseudomonas fluorescens]	0.277	Down	2.69e-06	54.157	17.802	5.4	3	3	3
WP_038441138.1	AMP-binding protein [Pseudomonas fluorescens]	1.202	Up	0.00018	59.646	195.99	32.2	14	23	14
WP_038441173.1	chain-length determining protein [Pseudomonas fluorescens]	0.800	Down	0.0304	50.119	21.188	6.7	3	4	3
WP_038441249.1	HlyD family type I secretion periplasmic adaptor subunit [Pseudomonas fluorescens]	1.293	Up	0.00807	47.824	110.2	34.3	12	15	12
WP_038441255.1	serine protease [Pseudomonas fluorescens]	1.291	Up	0.0183	106.95	323.31	29.4	22	47	21
WP_038441395.1	hypothetical protein [Pseudomonas fluorescens]	0.344	Down	0.0255	8.4516	14.098	25	1	1	1
WP_038441396.1	glycogen debranching enzyme [Pseudomonas fluorescens]	0.747	Down	0.0489	80.911	34.967	6.6	5	5	5
WP_038441452.1	hypothetical protein [Pseudomonas fluorescens]	0.450	Down	0.0028	9.4186	25.04	41.2	3	5	3
WP_038441530.1	oxidoreductase [Pseudomonas fluorescens]	1.255	Up	0.00133	18.857	48.401	35.4	6	7	6
WP_038441531.1	ACP phosphodiesterase [Pseudomonas fluorescens]	0.619	Down	0.00822	19.687	83.448	25.4	4	4	4
WP_038441533.1	LysR family transcriptional regulator [Pseudomonas fluorescens]	1.288	Up	0.039	32.407	28.712	18.6	3	3	3
WP_038441553.1	anaerobic ribonucleoside triphosphate reductase [Pseudomonas fluorescens]	1.311	Up	0.0315	75.143	48.56	10.4	6	6	6
WP_038441626.1	hydrolase [Pseudomonas fluorescens]	0.728	Down	0.0357	22.964	145.27	45.7	8	18	8
WP_038441629.1	formyl transferase [Pseudomonas fluorescens]	1.364	Up	0.0019	63.107	205.53	33.4	17	23	17
WP_038441636.1	NADPH:quinone reductase [Pseudomonas fluorescens]	1.569	Up	0.0151	32.239	111.36	27	6	27	6
WP_038441701.1	hydroxyproline-2-epimerase [Pseudomonas fluorescens]	1.252	Up	0.0156	33.542	47.618	20.1	7	8	7
WP_038441702.1	dihydrodipicolinate synthase family protein [Pseudomonas fluorescens]	1.305	Up	0.0237	34.155	155.28	40.6	13	28	13
WP_038441714.1	chaperone protein HchA [Pseudomonas fluorescens]	0.749	Down	0.000542	32.094	200.86	51.2	15	34	15
WP_038441749.1	isocitrate lyase [Pseudomonas fluorescens]	0.821	Down	0.0147	48.488	323.31	58.7	27	70	27
WP_038441759.1	ABC transporter substrate-binding protein [Pseudomonas fluorescens]	0.342	Down	0.0396	64.887	171.23	34.5	18	24	18
WP_038441829.1	dihydropyrimidinase [Pseudomonas fluorescens]	0.715	Down	0.000679	52.541	141.24	22.3	9	16	9
WP_038441886.1	"selenide, water dikinase [Pseudomonas fluorescens]"	1.231	Up	0.0468	36.404	31.009	15.7	5	5	5
WP_038441930.1	alkylhydroperoxidase [Pseudomonas fluorescens]	1.350	Up	0.0367	16.095	21.343	21.4	3	4	3
WP_038441955.1	methionine gamma-lyase [Pseudomonas fluorescens]	0.482	Down	0.00869	44.216	20.035	6.6	2	2	2
WP_038441969.1	hypothetical protein [Pseudomonas fluorescens]	0.684	Down	0.00117	13.297	29.004	35.5	3	4	3
WP_038442059.1	LysR family transcriptional regulator [Pseudomonas fluorescens]	1.236	Up	0.0306	32.335	16.793	7.1	2	2	2
WP_038442089.1	molybdenum cofactor sulfurase [Pseudomonas fluorescens]	1.202	Up	0.0497	25.493	54.739	31.6	8	10	8
WP_038442136.1	malate:quinone oxidoreductase [Pseudomonas fluorescens]	0.833	Down	0.00907	60.015	243.31	43.2	19	35	19
WP_038442204.1	hypothetical protein [Pseudomonas fluorescens]	0.745	Down	0.0496	6.3752	26.964	64.9	4	6	4
WP_038442358.1	hypothetical protein [Pseudomonas fluorescens]	0.330	Down	0.00712	28.571	18.404	11.1	3	3	3
WP_038442438.1	hypothetical protein [Pseudomonas fluorescens]	0.656	Down	0.00065	22.366	148.45	44.1	9	17	9
WP_038442492.1	acylaldehyde oxidase [Pseudomonas fluorescens]	0.759	Down	0.015	83.479	17.378	3.8	3	3	3
WP_038442549.1	bifunctional UDP-glucuronic acid oxidase/UDP-4-amino-4-deoxy-L-arabinose formyltransferase [Pseudomonas fluorescens]	0.202	Down	0.001	73.879	18.323	5	3	3	3
WP_038442554.1	MULTISPECIES: UDP-glucose 6-dehydrogenase [Pseudomonas]	0.442	Down	0.00352	51.203	35.146	17.5	8	9	5
WP_038442568.1	MULTISPECIES: integrase [Pseudomonas]	1.255	Up	0.0335	53.007	6.8976	1.9	1	1	1
WP_038442729.1	dehydrogenase [Pseudomonas fluorescens]	0.673	Down	0.0105	12.494	21.812	35.1	3	3	3
WP_038442747.1	pili assembly chaperone [Pseudomonas fluorescens]	0.291	Down	4.2e-05	48.693	92.863	11.8	5	5	5
WP_038442760.1	3-hydroxybutyryl-CoA dehydratase [Pseudomonas fluorescens]	0.798	Down	0.0273	17.184	26.352	21.2	3	5	3
WP_038442791.1	23S rRNA pseudouridylate synthase B [Pseudomonas fluorescens]	0.798	Down	0.0017	45.845	104.32	33.5	13	16	13
WP_038442806.1	CoA transferase [Pseudomonas fluorescens]	1.259	Up	0.0374	48.719	58.011	23.8	7	9	7
WP_038442810.1	arginine deiminase [Pseudomonas fluorescens]	0.797	Down	0.00734	46.367	323.31	55.7	20	122	20
WP_038442811.1	ornithine carbamoyltransferase [Pseudomonas fluorescens]	0.802	Down	0.00243	37.828	323.31	74.4	21	151	21
WP_038442812.1	carbamate kinase [Pseudomonas fluorescens]	0.803	Down	0.00235	32.709	165.29	50.8	16	67	16
WP_038442821.1	quinolinate synthetase [Pseudomonas fluorescens]	1.224	Up	0.0206	38.295	71.83	20.5	7	7	7
WP_038442839.1	DNA starvation/stationary phase protection protein [Pseudomonas fluorescens]	0.799	Down	0.0049	17.734	211.69	60.5	10	50	10
WP_038442842.1	histidine triad (HIT) protein [Pseudomonas fluorescens]	1.253	Up	0.0467	15.957	40.917	32.6	4	5	4
WP_038442895.1	diguanylate cyclase response regulator [Pseudomonas fluorescens]	0.797	Down	0.037	37	60.327	21.6	6	9	6
WP_038442896.1	chemotaxis response regulator protein-glutamate methylesterase [Pseudomonas fluorescens]	0.746	Down	0.0324	35.901	13.159	4.2	2	2	2
WP_038442897.1	hybrid sensor histidine kinase/response regulator [Pseudomonas fluorescens]	0.787	Down	0.0021	84.391	78.621	15	11	13	11
WP_038442902.1	chemotaxis protein [Pseudomonas fluorescens]	0.812	Down	0.00607	58.813	122.39	26.7	11	14	11
WP_038442912.1	sulfatase [Pseudomonas fluorescens]	0.553	Down	0.0108	71.547	112.82	15.4	10	13	10
WP_038442934.1	acetyltransferase [Pseudomonas fluorescens]	0.747	Down	0.0383	18.482	7.5345	6.7	1	1	1
WP_038443035.1	DNA mismatch repair protein MutT [Pseudomonas fluorescens]	1.326	Up	0.00109	14.68	38.173	27.7	3	3	3
WP_038443062.1	glucose dehydrogenase [Pseudomonas fluorescens]	0.470	Down	0.00414	85.74	74.435	13.1	10	12	10
WP_038443376.1	acyl-CoA dehydrogenase [Pseudomonas fluorescens]	0.678	Down	0.00309	41.702	57.807	13.5	5	7	5
WP_038443388.1	periplasmic/secreted protein [Pseudomonas fluorescens]	0.366	Down	0.00218	25.53	83.733	33.5	10	17	10
WP_038443527.1	TetR family transcriptional regulator [Pseudomonas fluorescens]	1.255	Up	0.047	26.096	6.2767	6.7	1	1	1
WP_038443551.1	acyl-CoA dehydrogenase [Pseudomonas fluorescens]	0.695	Down	0.000126	59.742	78.779	20.1	9	9	9
WP_038443590.1	dehydratase [Pseudomonas fluorescens]	0.386	Down	0.00631	16.619	54.101	39.1	5	10	5
WP_038443620.1	alcohol dehydrogenase [Pseudomonas fluorescens]	0.804	Down	0.0163	35.613	219.25	42.9	13	25	13
WP_038443625.1	MULTISPECIES: dimethylallyltransferase [Pseudomonas]	0.824	Down	0.0148	23.9	24.262	11.1	2	2	2
WP_038443654.1	type III secretion system protein EcsC [Pseudomonas fluorescens]	1.231	Up	0.0442	21.53	43.16	23.6	6	7	6
WP_038443704.1	ABC transporter substrate-binding protein [Pseudomonas fluorescens]	0.477	Down	0.000677	27.552	11.77	7	2	2	2
WP_038443738.1	catalase [Pseudomonas fluorescens]	0.469	Down	0.00268	53.771	301.53	46.1	21	43	21
WP_038443791.1	alcohol dehydrogenase [Pseudomonas fluorescens]	0.346	Down	0.00556	39.726	44.379	19.4	5	5	5
WP_038443794.1	spermidine/putrescine ABC transporter substrate-binding protein [Pseudomonas fluorescens]	0.524	Down	0.0247	37.699	15.077	6.9	2	2	2
WP_038443817.1	hypothetical protein [Pseudomonas fluorescens]	0.153	Down	0.000109	48.623	53.725	16.3	7	9	7
WP_038443818.1	SpoVR family protein [Pseudomonas fluorescens]	0.230	Down	0.00771	61.034	64.071	20	10	10	10
WP_038443918.1	glycine cleavage system protein R [Pseudomonas fluorescens]	0.391	Down	0.00962	18.286	173.57	43	7	11	7
WP_038444000.1	glycine/betaine ABC transporter substrate-binding protein [Pseudomonas fluorescens]	0.657	Down	0.00505	34.498	17.524	9.5	3	3	3
WP_038444050.1	ArsR family transcriptional regulator [Pseudomonas fluorescens]	0.578	Down	0.00284	35.775	26.145	11.5	4	4	4
WP_038444052.1	methionine adenosyltransferase [Pseudomonas fluorescens]	0.580	Down	0.00157	42.655	149.34	36.1	12	25	12
WP_038444076.1	adenosylhomocysteinase [Pseudomonas fluorescens]	0.695	Down	0.00606	51.271	323.31	67	27	78	27
WP_038444162.1	monofunctional biosynthetic peptidoglycan transglycosylase [Pseudomonas fluorescens]	1.266	Up	0.0353	27.28	8.1229	5.4	1	1	1
WP_038444251.1	ATPase [Pseudomonas fluorescens]	0.762	Down	0.000486	15.289	49.158	37.2	6	17	6
WP_038444304.1	peroxidase [Pseudomonas fluorescens]	1.380	Up	0.0126	24.094	179.41	50.5	10	18	10
WP_038444359.1	NADPH:quinone oxidoreductase [Pseudomonas fluorescens]	0.463	Down	0.000433	34.069	32.184	8.9	2	4	2
WP_038444414.1	DNA-binding response regulator [Pseudomonas fluorescens]	0.795	Down	0.00915	27.485	66.066	32.7	7	12	7
WP_038444460.1	D-amino acid dehydrogenase small subunit [Pseudomonas fluorescens]	1.225	Up	0.0433	47.093	168.58	39.7	18	28	18
WP_038444515.1	hypothetical protein [Pseudomonas fluorescens]	0.087	Down	0.00526	13.711	56.408	50.8	6	11	6
WP_038444523.1	"phosphate ABC transporter, permease protein PstA [Pseudomonas fluorescens]"	1.295	Up	0.0164	60.531	35.754	10.8	5	6	5
WP_038444612.1	fatty acid methyltransferase [Pseudomonas fluorescens]	0.153	Down	3.41e-06	44.16	111.77	31.5	10	16	10
WP_038444663.1	copper ABC transporter ATPase [Pseudomonas fluorescens]	0.678	Down	0.0028	71.856	28.884	6.8	6	6	5
WP_038444665.1	copper oxidase [Pseudomonas fluorescens]	0.621	Down	0.00129	70.223	58.331	10	7	9	7
WP_038444668.1	MULTISPECIES: copper resistance protein CopB [Pseudomonas]	0.757	Down	0.029	38.701	47.729	22.6	6	6	6
WP_038444681.1	MULTISPECIES: hypothetical protein [Pseudomonas]	0.757	Down	0.000291	41.121	185.9	45.4	16	28	16
WP_038444789.1	hypothetical protein [Pseudomonas fluorescens]	0.343	Down	0.0138	7.5997	21.851	24	1	3	1
WP_038444793.1	peroxiredoxin OsmC [Pseudomonas fluorescens]	0.251	Down	0.00443	14.865	63.694	32.2	5	9	5
WP_038444813.1	cytochrome b559 subunit alpha [Pseudomonas fluorescens]	0.194	Down	9.29e-05	41.771	33.137	10.4	4	5	4
WP_038444904.1	acyl-CoA dehydrogenase [Pseudomonas fluorescens]	0.780	Down	0.039	43.162	131.9	25.7	8	12	8
WP_038444905.1	CoA transferase [Pseudomonas fluorescens]	0.769	Down	0.0238	43.325	50.64	17.5	6	8	6
WP_038444932.1	nitrate ABC transporter substrate-binding protein [Pseudomonas fluorescens]	1.554	Up	0.0224	37.059	13.98	5	2	2	2
WP_038444954.1	hypothetical protein [Pseudomonas fluorescens]	0.142	Down	0.000272	9.2264	22.351	31.2	2	5	2
WP_038444999.1	hypothetical protein [Pseudomonas fluorescens]	0.787	Down	0.0111	21.827	13.155	10.5	2	2	2
WP_038445051.1	ABC transporter permease [Pseudomonas fluorescens]	1.394	Up	0.0414	36.725	101.1	39	13	17	13
WP_038445101.1	methionine ABC transporter substrate-binding protein [Pseudomonas fluorescens]	1.271	Up	0.0364	28.075	112.7	43.8	12	24	11
WP_038445107.1	glutamine ABC transporter substrate-binding protein [Pseudomonas fluorescens]	1.271	Up	0.0101	31.618	62.38	28.5	7	9	7
WP_038445117.1	RND transporter [Pseudomonas fluorescens]	0.550	Down	0.0104	38.213	28.751	10.1	4	4	4
WP_038445174.1	taurine dioxygenase [Pseudomonas fluorescens]	1.285	Up	0.0102	31.085	30.895	18.3	5	5	5
WP_038445178.1	taurine transporter ATP-binding subunit [Pseudomonas fluorescens]	1.597	Up	0.000231	28.228	17.506	8.5	3	3	3
WP_038445179.1	taurine ABC transporter substrate-binding protein [Pseudomonas fluorescens]	1.319	Up	0.0297	34.318	42.882	18.2	5	8	5
WP_038445316.1	nitrogen regulation protein NR(I) [Pseudomonas fluorescens]	0.759	Down	0.0109	53.203	108.58	26.6	13	14	13
WP_038445324.1	maltodextrin phosphorylase [Pseudomonas fluorescens]	0.553	Down	0.00591	91.993	111.68	17.4	13	18	13
WP_038445561.1	phosphodiesterase [Pseudomonas fluorescens]	1.204	Up	0.0127	29.793	47.314	31	6	7	6
WP_038445608.1	branched chain amino acid ABC transporter substrate-binding protein [Pseudomonas fluorescens]	0.577	Down	0.0028	40.058	148.58	37.6	15	22	15
WP_038445610.1	ABC transporter ATP-binding protein [Pseudomonas fluorescens]	0.595	Down	0.0013	32.318	7.5949	3.4	1	1	1
WP_038445657.1	hybrid sensor histidine kinase/response regulator [Pseudomonas fluorescens]	1.261	Up	0.000702	102.31	49.761	3.8	4	6	4
WP_038445679.1	arginine decarboxylase [Pseudomonas fluorescens]	0.821	Down	0.0161	71.083	153.86	19.6	11	19	11
WP_038445690.1	lipoprotein [Pseudomonas fluorescens]	0.746	Down	0.000266	20.775	15.099	11.9	2	3	2
WP_038445699.1	DNA-binding response regulator [Pseudomonas fluorescens]	0.574	Down	0.00215	29.04	43.898	14.6	4	6	4
WP_038445708.1	ATPase [Pseudomonas fluorescens]	0.100	Down	0.000584	47.045	26.929	7.8	4	4	4
WP_038445709.1	pilus assembly protein [Pseudomonas fluorescens]	0.216	Down	0.00283	43.344	59.643	16.4	6	7	6
WP_038445713.1	Flp pilus assembly protein CpaB [Pseudomonas fluorescens]	0.217	Down	0.00161	33.35	16.002	5.4	2	2	2
WP_038445722.1	potassium ABC transporter ATPase [Pseudomonas fluorescens]	0.380	Down	0.00197	62.565	38.119	9.6	5	5	5
WP_038445726.1	beta-oxoacyl-ACP reductase [Pseudomonas fluorescens]	0.539	Down	0.011	47.321	31.169	10.7	5	5	5
WP_038445729.1	acetyl-CoA acetyltransferase [Pseudomonas fluorescens]	0.399	Down	0.0028	45.459	50.655	14.6	7	9	7
WP_038445862.1	MULTISPECIES: MBL fold metallo-hydrolase [Pseudomonas]	1.785	Up	0.0112	31.907	6.4466	2.4	1	1	1
WP_038445987.1	hypothetical protein [Pseudomonas fluorescens]	0.806	Down	0.00674	107.14	246.63	31.8	29	41	29
WP_038445993.1	acetyl-coenzyme A synthetase [Pseudomonas fluorescens]	0.675	Down	0.000283	71.048	144.97	23.4	15	22	15
WP_038446019.1	ABC transporter substrate-binding protein [Pseudomonas fluorescens]	1.268	Up	0.0137	30.26	28.607	8.6	2	3	2
WP_038446035.1	chromosome partitioning protein [Pseudomonas fluorescens]	1.272	Up	0.0438	27.016	15.703	8.4	2	4	2
WP_038446038.1	hypothetical protein [Pseudomonas fluorescens]	0.480	Down	0.0165	42.948	15.352	5.9	2	2	2
WP_038446044.1	cytochrome-c peroxidase [Pseudomonas fluorescens]	1.464	Up	0.0188	41.943	60.811	17.1	6	7	6
WP_038446045.1	cation transporter [Pseudomonas fluorescens]	1.387	Up	0.0198	113.38	95.477	12.9	13	13	13
WP_038446049.1	porin [Pseudomonas fluorescens]	1.512	Up	0.0382	49.008	115.17	24.4	8	12	8
WP_038446050.1	hypothetical protein [Pseudomonas fluorescens]	1.669	Up	8.69e-05	12.024	16.57	18.2	2	4	2
WP_038446051.1	chemotaxis protein [Pseudomonas fluorescens]	1.204	Up	0.0251	48.212	89.905	24.4	9	14	9
WP_038446132.1	glutathione peroxidase [Pseudomonas fluorescens]	0.763	Down	0.00123	17.546	83.464	49.4	6	10	6
WP_038446137.1	cytochrome c biogenesis protein CcsA [Pseudomonas fluorescens]	1.204	Up	0.0144	35.655	138.4	34.8	10	35	10
WP_038446180.1	amino acid dehydrogenase [Pseudomonas fluorescens]	0.293	Down	0.000362	35.165	24.651	9.4	3	3	3
WP_038446239.1	aspartate aminotransferase [Pseudomonas fluorescens]	0.522	Down	9.26e-05	42.349	116.29	27	9	14	9
WP_038446265.1	dehydrogenase [Pseudomonas fluorescens]	1.227	Up	0.0317	25.776	91.14	35.6	7	11	7
WP_038446334.1	trehalose permease IIC protein [Pseudomonas fluorescens]	0.525	Down	0.00167	51.353	45.743	9.2	3	5	3
WP_038446349.1	iron dicitrate transport regulator FecR [Pseudomonas fluorescens]	1.242	Up	0.0138	35.658	16.329	8	2	2	2
WP_038446389.1	oxidoreductase [Pseudomonas fluorescens]	0.275	Down	5.5e-06	40.455	182.14	40.5	10	12	10
WP_038446428.1	hypothetical protein [Pseudomonas fluorescens]	0.594	Down	0.00167	23.555	241.4	55.7	10	28	10
WP_038446429.1	lipoprotein [Pseudomonas fluorescens]	0.816	Down	0.0335	14.241	30.835	31.6	4	5	4
WP_038446497.1	membrane protein [Pseudomonas fluorescens]	0.262	Down	0.0336	24.002	53.778	23.8	6	7	6
WP_038446518.1	short chain dehydrogenase [Pseudomonas fluorescens]	0.584	Down	0.00243	20.89	12.341	10.6	2	2	2
WP_038446551.1	3-oxoadipate enol-lactonase [Pseudomonas fluorescens]	0.704	Down	0.00306	28.34	138.83	21.3	5	6	5
WP_038446582.1	cardiolipin synthase B [Pseudomonas fluorescens]	0.652	Down	0.0111	44.48	6.5008	2.1	1	1	1
WP_038446651.1	RNA polymerase sigma-H factor AlgU [Pseudomonas fluorescens]	1.458	Up	0.0178	20.861	47.2	29.7	4	5	4
WP_038446669.1	3-hydroxyacyl-CoA dehydrogenase [Pseudomonas fluorescens]	1.319	Up	0.00878	75.885	24.654	5.8	4	4	4
WP_038446670.1	acyl-CoA dehydrogenase [Pseudomonas fluorescens]	1.440	Up	0.0229	44.149	19.173	7.8	3	3	3
WP_038446671.1	acyl-CoA dehydrogenase [Pseudomonas fluorescens]	1.276	Up	0.0329	41.573	51.799	11.8	3	3	3
WP_038446678.1	3-hydroxyacyl-CoA dehydrogenase [Pseudomonas fluorescens]	1.290	Up	0.0119	54.92	11.259	3.3	2	2	2
WP_038446683.1	long-chain-fatty-acid--CoA ligase [Pseudomonas fluorescens]	1.598	Up	0.0218	62.439	14.315	3.4	2	2	2
WP_038446690.1	LysR family transcriptional regulator [Pseudomonas fluorescens]	1.324	Up	0.0431	35.48	12.082	7	2	2	2
WP_038446702.1	calcium channel protein [Pseudomonas fluorescens]	0.170	Down	0.000787	31.366	54.243	25.7	8	8	8
WP_038446837.1	channel protein TolC [Pseudomonas fluorescens]	0.310	Down	0.000286	50.624	46.012	15.3	6	6	6
WP_038446911.1	recombinase RmuC [Pseudomonas fluorescens]	1.204	Up	0.00402	55.545	21.487	4.9	3	3	3
WP_038446955.1	flagellar protein FlaG [Pseudomonas fluorescens]	1.231	Up	0.0315	12.234	121	80.7	7	10	7
WP_038446964.1	sigma-54-dependent Fis family transcriptional regulator [Pseudomonas fluorescens]	1.226	Up	0.0149	49.65	80.994	25.7	10	12	10
WP_038446976.1	anti-anti-sigma factor [Pseudomonas fluorescens]	0.182	Down	4.82e-05	11.236	50.69	57.4	7	11	7
WP_038446996.1	hypothetical protein [Pseudomonas fluorescens]	0.689	Down	0.0129	17.171	7.9756	6.5	1	1	1
WP_038447055.1	2-hydroxy-3-oxopropionate reductase [Pseudomonas fluorescens]	0.753	Down	0.0159	30.621	81.29	31.4	7	12	7
WP_038447056.1	hydroxypyruvate isomerase [Pseudomonas fluorescens]	0.659	Down	0.00705	28.826	25.608	13.8	4	4	4
WP_038447108.1	chemotaxis protein [Pseudomonas fluorescens]	0.565	Down	0.00285	58.515	34.275	7.9	4	4	4
WP_038447141.1	NADP-dependent oxidoreductase [Pseudomonas fluorescens]	0.819	Down	0.0325	35.637	23.314	12.5	4	6	3
WP_038447190.1	acyl-CoA dehydrogenase [Pseudomonas fluorescens]	0.663	Down	0.00626	88.622	96.244	11.2	8	11	8
WP_038447194.1	glutathione S-transferase [Pseudomonas fluorescens]	1.209	Up	0.016	23.45	53.373	26.3	6	9	6
WP_038447240.1	ABC transporter substrate-binding protein [Pseudomonas fluorescens]	0.461	Down	0.00883	38.185	190.02	32.7	9	20	9
WP_038447400.1	glycosyl transferase [Pseudomonas fluorescens]	0.443	Down	0.0187	34.188	12.996	6.9	2	2	2
WP_038447693.1	glyoxalase [Pseudomonas fluorescens]	0.128	Down	3.59e-06	16.539	13.327	10.6	2	2	2
WP_038447698.1	alkanesulfonate monooxygenase [Pseudomonas fluorescens]	1.447	Up	0.00649	41.738	33.877	12.1	4	7	4
WP_038447780.1	LysR family transcriptional regulator [Pseudomonas fluorescens]	1.419	Up	0.0208	33.135	14.273	6.4	2	2	2
WP_038447969.1	"3,4-dihydroxyphenylacetate 2,3-dioxygenase [Pseudomonas fluorescens]"	1.235	Up	0.0258	31.772	16.501	8.1	3	3	3
WP_038448109.1	hypothetical protein [Pseudomonas fluorescens]	0.312	Down	0.000787	21.658	14.307	9.7	2	2	2
WP_038448138.1	AraC family transcriptional regulator [Pseudomonas fluorescens]	0.718	Down	0.013	29.657	11.881	8.4	2	2	2
WP_038448194.1	flagellar hook-length control protein FliK [Pseudomonas fluorescens]	0.772	Down	0.022	55.532	13.525	4.2	2	2	2
WP_038448213.1	enoyl-CoA hydratase [Pseudomonas fluorescens]	0.756	Down	0.0278	28.361	12.42	8	2	2	2
WP_050492802.1	MULTISPECIES: DNA-binding response regulator [Pseudomonas fluorescens group]	1.313	Up	0.00212	20.957	60.271	42.3	7	9	7
WP_051903012.1	peptidase [Pseudomonas fluorescens]	1.336	Up	0.0145	62.651	80.404	17.9	9	11	9
WP_051903056.1	mechanosensitive ion channel protein MscS [Pseudomonas fluorescens]	1.316	Up	0.0478	86.984	15.663	3.1	3	3	3
WP_051903058.1	hypothetical protein [Pseudomonas fluorescens]	1.467	Up	0.00951	15.528	35.69	42.4	5	5	5
